# Supplementary material for: CRLF3 plays a key role in the final stage of platelet genesis and is a potential therapeutic target for thrombocythaemia
Source: PubMed Central journal article supplement (PMC7614665; doi:10.1182/blood.2021013113), 2022-04-07
Supplement: EMS176309-supplement-Supplementary_Material.pdf [file EMS176309-supplement-Supplementary_Material.pdf]

## 1 Supplemental Data

### 3 Supplemental Methods

#### 5 Generation of *Crlf3*<sup>-/-</sup> mice

7 The generation of *Crlf3*<sup>-/-</sup> mice is illustrated in Supplemental Figure 7. The ES cell clone used was  
8 EPD0033\_3\_C11 and was selected based on neomycin resistance and β-galactosidase expression  
9 confirming *Crlf3*<sup>tm1a(KOMP)Wtsi</sup> allele expression. Mice were generated according to standard  
10 techniques and after germline transmission of the *Crlf3*<sup>tm1a(KOMP)Wtsi</sup> allele, exon 2 of *Crlf3* was excised  
11 by Cre-mediated recombination by crossing with *Hprt*<sup>Tg(CMV-cre)Brd</sup> mice, producing the mutant  
12 *Crlf3*<sup>tm1b(KOMP)Wtsi</sup> allele. After confirmation of allele conversion by PCR, chimeric mice carrying the  
13 *Crlf3*<sup>tm1b(KOMP)Wtsi</sup> allele were backcrossed to C57BL/6 mice.

#### 15 Blood and tissue analysis

17 Blood smears were created by pushing whole venous blood across a microscope slide and leaving to  
18 air dry overnight. Blood smears were then stained with Rapid Romanowsky staining kit (TCS  
19 biosciences) following the manufacturer's instructions. For confocal microscopy, blood smears were  
20 washed with 50mM ammonium chloride to remove red cells, then remaining cells were  
21 permeabilised with PBS containing 0.1% w/v saponin and 0.2% w/v gelatin (both Sigma-Aldrich).  
22 Samples were incubated with primary antibodies against CD41 (133902; BioLegend) and vWF  
23 (A0082; DakoCytomation). Samples were washed before incubating with appropriate secondary  
24 antibodies (Alexa Fluor 488 Goat anti-rat IgG (A-11006) or Alexa Fluor 555 Goat anti-rabbit IgG (A-  
25 21428); both Invitrogen). Samples were again washed before glass coverslips were mounted using  
26 hydromount (National Diagnostics) and images were acquired using a Leica Sp5 inverted confocal  
27 microscope with the 63x immersion-oil objective and the Leica LAS 2.1 software.

29 Plasma thrombopoietin (TPO) levels were measured with the Quantikine Mouse TPO ELISA kit (R&D  
30 Systems).

32 For histologic analysis, mice were examined after sacrifice. Specimens were collected into 10%  
33 neutral buffered formalin solution (Sigma-Aldrich). Fixed tibia and spleens were embedded in  
34 paraffin and sections cut, deparaffinised and rehydrated. Sections were then stained with

1 Haematoxylin and Eosin stain or Gömöri's reticulin silver stain for reticulin fibres. After staining,  
2 images were acquired using an Axiovert 40 CFL or Olympus microscope and AxioVision 40 version  
3 4.8.2.0 software (both Zeiss) and MKs blindly quantified manually. A Pixera 600ES camera was used  
4 for digital photomicroscopy of the blood and bone marrow.

5

#### 6 Expression array and qRT-PCR

7

8 RNA was extracted from purified *in vitro* cultured MKs using RNeasy plus mini Kit (Qiagen).  
9 Complementary (c) DNA was made using SuperScript III First Strand Kit (Invitrogen) starting from  
10 100ng total RNA and using oligo-dT as reverse transcription primers. Expression levels were  
11 quantified using Illumina Mus 6v2 expression chip. Data processing and analysis were performed as  
12 described elsewhere<sup>1</sup>. Quantitative polymerase chain reaction (qPCR) of the murine genes *Crlf3* and  
13 *Gapdh* was carried out using specific primers that had previously been tested for optimal efficiency,  
14 Brilliant II SYBR green chemistry (Agilent Technologies) and Mx3000P Real-Time PCR system  
15 (Stratagene). The analysis of gene expression was performed by the  $\Delta$ Ct method, where:

16  $\Delta$ Ct = Ct target gene (*Crlf3*) – Ct housekeeping gene (*Gapdh*)

17 Relative gene expression was expressed as  $2^{-\Delta$ Ct}.

18

19 *Crlf3* specific primers:

20 Forward: 5'-GGGTGTTCTCTACTCCAGCG-3'

21 Reverse: 5'-GCCATTCTGCCTTTCTGCAC-3'

22

23 *Gapdh* specific primers:

24 Forward: 5'-CCCTAAGAGGGATGCTGCC-3'

25 Reverse: 5'-TACGGCCAAATCCGTTACACA-3'

26

#### 27 Western blot

28

29 Total cellular lysates of washed platelets, iPSCs and iPSC-MKs were prepared by direct cellular lysis  
30 with RIPA buffer (150mM sodium chloride, 60mM Tris pH 8.0, 0.6% w/v sodium deoxycholate, 0.1%  
31 w/v sodium dodecyl sulfate, 1% v/v NP-40) supplemented with protease (Roche) and phosphatase  
32 (Sigma-Aldrich) inhibitors, incubation on ice for 30 min and followed by centrifugation at 13,000g at  
33 4°C for 5 min. Fractionated platelet samples were prepared as previously described<sup>2</sup>. For  
34 immunoprecipitation (IP) samples, iPSCs were harvested at D20 of MK forward programming. iPSC-

1 MKs were centrifuged for 8 min at 120 g, washed three times in ice cold PBS and snap frozen on dry  
2 ice. Samples were then resuspended in 10 mM Tris-HCl pH 8, 150 mM NaCl, 0.5 % NP-40 and protein  
3 content was quantified by BCA assay (Thermo). 50  $\mu$ L Protein G Dynabeads (Invitrogen) were  
4 washed x3 in PBS 0.01% Tween-20. Samples were resuspended in 50  $\mu$ L PBS 0.01% Tween-20 and  
5 incubated for 40 min at RT on an orbital rotator with 1  $\mu$ g of antibody. The beads were washed x3 in  
6 PBS 0.01% Tween-20 and added to cell lysate at 1 ml/mL. Samples were rotated at 225 rpm at 4°C  
7 overnight. Supernatants were stored and beads were washed x3 in PBS 0.01% Tween-20 with 1X  
8 protease inhibitors (cOmplete mini EDTA free, Roche) and 1X PhosSTOP (Roche). They were  
9 transferred to a new eppendorf on the last wash and resuspended in 30  $\mu$ L MPER (Thermo) 1:4  
10 NuPAGE sample buffer (Invitrogen) with 1:10 reducing agent (Invitrogen). Denaturation was carried  
11 out for 10 min at 70°C. Supernatant was collected from beads and loaded on a Western Blot as  
12 below.

13  
14 Samples were diluted 1:1 with 2x Laemmli sample buffer (125mM Tris pH 6.8, 20% v/v glycerol, 4%  
15 w/v sodium dodecyl sulfate, 10% v/v  $\beta$ -mercaptoethanol, 0.002% w/v bromophenol blue) and  
16 incubated at 95°C for 5 min to denature proteins. Proteins were resolved by sodium dodecyl sulfate-  
17 polyacrylamide gel electrophoresis under reducing conditions and transferred to PVDF membrane  
18 (Millipore) and probed by the following antibodies. Membranes were imaged with Odyssey Fc OFC-  
19 1095 version 1.0.36 imaging system. Expression was quantified using Image Studio Lite.

20  
21 The following primary antibodies were used: anti-CRLF3 (HPA007596; Atlas antibodies), anti-GAPDH  
22 (2118; Cell Signalling Technology), anti- $\alpha$ -tubulin (T5168; Sigma-Aldrich and GTX102078; GeneTex),  
23 anti-tyrosine tubulin (T9028; Sigma-Aldrich), anti-glutamylated  $\alpha$ -tubulin (AG-20B-0020 and AG-25B-  
24 0030; AdipoGen Life Sciences), anti-acetylated  $\alpha$ -tubulin (sc23950; Santa Cruz Biotechnology), anti-  
25 FLAG (F1804; Sigma-Aldrich), anti- $\beta$ -actin (A1978; Sigma-Aldrich), anti- STK38 (ab56977; Abcam),  
26 anti-pSTK38 (SPC-1035; StressMarq), anti-MOB1A (ab221988; Abcam), anti-pMOB1 (8699S, Cell  
27 Signalling Technology) and anti-human thrombospondin (ab1823; Abcam). Where  $\alpha$ -tubulin or  
28 modified  $\alpha$ -tubulin blots presented as a double band in MK samples, analysis was conducted on the  
29 band corresponding to the band seen in platelet samples.

30  
31 For the measurement of the post-translational modification of tubulin, we first measured the  
32 polyglutamylated/acetylated/tyrosinated tubulin content. Following this, the membranes were  
33 stripped and total tubulin and GAPDH (loading control) content were measured concurrently. Before  
34 re-probing, stripped membranes were checked to be blank across all lanes. This method allowed us

1 to measure total tubulin content (vs GAPDH) as well as the ratio of modified tubulin vs total tubulin  
2 on the same samples. In some blots we measured one type of tubulin modification, then another  
3 after stripping the membrane and finally total tubulin and GAPDH.

#### 4 5 In vitro proplatelet formation

6  
7 Mature MKs were resuspended in culture medium supplemented with 100U/mL heparin sodium  
8 (Wockhardt UK Ltd) and seeded onto glass coverslips coated with 20ng/mL fibrinogen (Enzyme  
9 Research). Cells were incubated at 37°C under 5% CO<sub>2</sub> for either 3 or 5 hours. Attached MKs were  
10 fixed with 10% neutral buffered formalin solution and washed in PBS. Fixed MKs were stained with  
11 antibodies against CD41 (133902; BioLegend or sc-19963; Santa Cruz Biotechnology), F-actin (Alexa  
12 Flour 555 Phalloidin (A34055); Invitrogen), polyglutamylated tubulin (AG-20B-0020 or AG-25B-0030;  
13 AdipoGen Life Sciences), MOB1A (ab221988, Abcam),  $\alpha$ -tubulin (T5168, Sigma-Aldrich),  $\beta$ -tubulin  
14 (ab21057; Abcam), and the nuclear stain DAPI (Sigma-Aldrich). Images were acquired using a Leica  
15 Sp5 inverted confocal microscope with the 20x objective and the Leica LAS 2.1 software or a Zeiss  
16 LSM 880 MP Airyscan inverted confocal microscope with the 20x objective and Zeiss Zen software.  
17 For proplatelet dynamics, proplatelet forming MKs were counted against the total number of MKs to  
18 calculate the percentage of proplatelet forming MKs. At least 460 MKs were counted for each  
19 condition.

#### 20 21 Bone marrow transplantation

22  
23 Recipients were sub-lethally irradiated with a split dose of 950 cGY, separated by >4 hours.  
24  $5 \times 10^6$  WT or *Crlf3*<sup>-/-</sup> bone marrow (BM) cells were injected into WT or *Crlf3*<sup>-/-</sup> recipient mice via the  
25 tail vein. Peripheral venous blood was obtained to determine platelet counts using a Woodley ABC  
26 blood counter (Woodley). Donor chimaerism was determined by *Crlf3* expression by qRT-PCR of *in*  
27 *vitro* cultured MKs derived from recipient BM cells taken at termination of the experiment.

#### 28 29 Blood loss after tail transection

30  
31 Experiments were performed as per Evans et al, 2021<sup>3</sup>

#### 32 33 Electron Microscopy

34

1 For transmission electron microscopy (TEM), washed platelets fixed with 2.5% glutaraldehyde in  
2 50mM cacodylate buffer (pH 7.2). After embedding in epon 812, ultra-thin sections were generated  
3 and stained with 2% uranyl acetate and lead citrate. Samples were visualised with a Zeiss EM900  
4 microscope.

5

6 For scanning electron microscopy (SEM), washed platelets were resuspended in 0.85% sodium  
7 chloride, diluted 1:1 with 0.4% glutaraldehyde in 0.1M sodium cacodylate pH 7.4 and incubated at  
8 room temperature. Platelets were then pelleted at 1,000g and resuspended in fixation buffer (2%  
9 glutaraldehyde, 2% formaldehyde, 0.05M sodium cacodylate, pH 7.4). Platelets were rinsed in  
10 deionised water (DIW) and incubated in 1% osmium ferricyanide for 4 days, rinsed again in DIW and  
11 incubated in 2% uranyl acetate in 0.05M Maleate buffer (pH 5.5) for 4 days at 4°C. Platelets were  
12 resuspended in DIW and attached to poly-L-lysine coated glass coverslips. After unattached platelets  
13 were removed, samples were quench frozen in melting propane cooled in liquid nitrogen, then dried  
14 overnight in a Quorum K775 freeze dryer. The dry coverslips were attached to 13mm Cambridge  
15 SEM stubs with colloidal silver DAG sputter coated with 10 nm of iridium and viewed in a FEI Verios  
16 460L using a secondary electron detector.

17

#### 18 Tandem Affinity Purification (TAP)-tagging CRLF3 in induced pluripotent stem cells (iPSCs)

19

20 Tandem Affinity Purification (TAP)-tagging of CRLF3 at the C-terminus was performed by homology  
21 directed repair (HDR) by CRISPR/Cas9. CRISPR ID 1146192702 was picked from  
22 [www.sanger.ac.uk/htqt/wqe/](http://www.sanger.ac.uk/htqt/wqe/)<sup>4</sup>. Single-guide RNA (sgRNA) expression constructs were generated  
23 using the plasmid-based procedure as described by Ran, *et al.*<sup>5</sup> and cloned into the pSpCas9(BB)-2A-  
24 GFP plasmid (Addgene).

25

26 A donor vector containing 1Kb homology arms surrounding the TAP-tag<sup>6</sup> in a pBS KS vector backbone  
27 (Addgene) was created by Gibson Assembly following manufacturer's instructions (Gibson Assembly  
28 Cloning Kit; New England Biosciences).

29

30 sgRNA/Cas9-GFP plasmid and TAP-tag donor vector DNA were introduced into QolG (HipSci line  
31 HPSI1113i-qolG\_3 (<http://www.hipsci.org/>)) induced pluripotent stem cells (iPSCs) in a single cell  
32 solution by nucleofection using Amaxa Human Stem Cell Nucleofector Kit 2 and an Amaxa  
33 Nucleofector II (both Lonza), following manufacturer's instructions. 48 hours after nucleofection,  
34 cells were sorted based on GFP expression by flow assisted cell sorting. GFP positive iPSCs were

1 seeded individually to laminin 521 (Biolamina) coated 96 well tissue culture plates and maintained in  
2 Essential 8 (E8) medium (Gibco) supplemented with 100U/ml pen/strep (PAA Laboratories) for 5  
3 days then maintained as colonies in E8 medium on truncated vitronectin (VTN-N; ThermoFisher  
4 Scientific) coated tissue culture plastic plates (Corning) until needed.

5

#### 6 Mass Spectrometry and LC-MS/MS analysis

7

8 50x10<sup>6</sup> TAP-tagged or untagged iPSC-MKs were dissociated to a single cell solution, washed 3 times  
9 in PBS then snap frozen and stored at -80°C until needed. Frozen pellets were then lysed in lysis  
10 buffer (10mM Tris hydrochloride, 150mM sodium chloride, 0.1% NP-40), centrifuged at 13,000rpm  
11 for 15 minutes and lysates collected. Proteins interacting with TAP-tagged CRLF3 were then  
12 collected by incubating the lysates with magnetic beads (Dynal protein G; Invitrogen) coated with  
13 anti-FLAG antibody (anti-FLAG M2; Sigma-Aldrich) before collecting the beads. Beads were then  
14 washed 3 times in lysis buffer and twice in TEV buffer (10mM Tris hydrochloride, 150mM sodium  
15 chloride, 0.1% NP-40, 0.5mM EDTA, 1mM Dithiothreitol) to remove unbound proteins. Bead bound  
16 proteins were dissociated by incubation with 100U AcTEV protease (Invitrogen) in TEV buffer before  
17 collection of the eluates. The eluates were then diluted in calmodulin binding buffer (CBB; 10mM  
18 Tris-HCl, 150mM sodium chloride, 1mM magnesium acetate, 1mM Imidazole, 2mM calcium chloride,  
19 10mM β-mercaptoethanol, 0.1% NP-40) before interacting proteins were further purified by  
20 incubation of the diluted eluates with calmodulin binding peptide (CBP) affinity resin (Agilent),  
21 pelleting and removal of the supernatant. CBP resin was then washed 3 times with CBB before  
22 incubation in calmodulin elution buffer (10mM Tris-HCl, 150mM sodium chloride, 0.02% NP-40,  
23 1mM magnesium acetate, 1mM Imidazole, 20mM EGTA, 10mM β-mercaptoethanol) to dissociate  
24 bound proteins, which were collected in the eluates after pelleting of the CBP resin. The eluates  
25 were then snap frozen and stored at -80°C until mass spectrometry was performed.

26

27 Samples were mixed with SDS loading buffer and run on 12% SDS PAGE gel to remove MS  
28 incompatible detergents. Samples were only run till a dye front was about 2cm below the well. Gel  
29 was stained with Coomassie blue colloidal stain and each lane cut into 4 equal pieces. Each piece  
30 was finely chopped and transferred to 0.5ml Eppendorf tube and was treated as individual MS  
31 sample. The gel pieces were destained by washing with 50% acetonitrile, 50% ammonium  
32 bicarbonate followed by wash with HPLC water. Destained samples were then treated with 100%  
33 acetonitrile, air dried and reduced with 10mM DTT in 100mM ammonium bicarbonate for 1 hour at  
34 37°C. The DTT solution was removed and replaced with 55mM iodoacetamide in 100mM

1 ammonium bicarbonate and incubated for 45 minutes at RT in darkness. Samples were then washed  
2 with 50% ammonium bicarbonate, 50% acetonitrile followed by addition of 100% acetonitrile.  
3 Acetonitrile was removed and samples dried again, before resuspending in a 1:200 solution of  
4 trypsin in 50mM ammonium bicarbonate and incubating overnight at 37°C.

5 LC-MS/MS analysis

6 Post-trypsin digestion, the supernatant was pipetted into a sample vial and loaded onto an  
7 autosampler for automated LC-MS/MS analysis.

8

9 All LC-MS/MS experiments were performed using a Dionex Ultimate 3000 RSLC nanoUPLC system  
10 and a Q Exactive Orbitrap mass spectrometer (both Thermo Fisher Scientific). Separation of peptides  
11 was performed by reverse-phase chromatography at a flow rate of 300nL/min and a Thermo  
12 Scientific reverse-phase nano Easy-spray column (Thermo Scientific PepMap C18, 2µm particle size,  
13 100Å pore size, 75nm i.d. x 50cm length). Peptides were loaded onto a pre-column (Thermo  
14 Scientific PepMap 100 C18, 5µm particle size, 100Å pore size, 300nm i.d. x 5mm length) from the  
15 Ultimate 3000 autosampler with 0.1% formic acid for 3 minutes at a flow rate of 10nL/min. After this  
16 period, the column valve was switched to allow elution of peptides from the pre-column onto the  
17 analytical column. Solvent A was water + 0.1% formic acid and solvent B was 80% acetonitrile, 20%  
18 water + 0.1% formic acid. The linear gradient employed was 2-40% B in 30 minutes.

19

20 The LC eluent was sprayed into the mass spectrometer by means of an Easy-Spray source  
21 (ThermoFisher Scientific). All  $m/z$  values of eluting ions were measured in an Orbitrap mass analyzer,  
22 set at a resolution of 70000 and was scanned between  $m/z$  380-1500. Data dependent scans (Top  
23 20) were employed to automatically isolate and generate fragment ions by higher energy collisional  
24 dissociation (HCD, NCE:25%) in the HCD collision cell and measurement of the resulting fragment  
25 ions was performed in the Orbitrap analyser, set at a resolution of 17500. Singly charged ions and  
26 ions with unassigned charge states were excluded from being selected for MS/MS and a dynamic  
27 exclusion window of 20 seconds was employed.

28

29 Post-run, the data was processed using Protein Discoverer (version 2.1., Thermo Scientific). Briefly,  
30 all MS/MS data were converted to mgf files and the files were then submitted to the Mascot search  
31 algorithm (Matrix Science) and searched against the UniProt human database  
32 (UniProt\_Human201701 201701, 70956 sequences; 23911858 residues) and a common contaminant  
33 sequences (115 sequences, 38274 residues). Variable modifications of oxidation (M), deamidation  
34 (NQ) and carbamidomethyl were applied. The peptide and fragment mass tolerances were set to

1 5ppm and 0.1 Da, respectively. A significance threshold value of  $p < 0.05$ , false discovery rate (FDR)  
2 was set at 5% for identification of both proteins and peptides and a peptide cut-off score of 20 were  
3 also applied. Data is presented as unique peptide counts and normalised total spectra, which  
4 normalises the spectral count for each peptide in each sample to the average total spectral count  
5 across all samples.

#### 6 Cloning, production, purification and structural solution of amino acid 174-442 of CRLF3

7  
8  
9 *Crlf3* amino acid 174-442 was amplified from murine *in vitro* cultured MK cDNA by PCR using specific  
10 primers that include the BamHI or NotI restriction sites and Platinum High Fidelity Taq Polymerase  
11 (Invitrogen) following manufacturer's instructions. Purified PCR products were ligated into BamHI  
12 and NotI digested pGEX-6P-2 (GE Healthcare) using T4 Ligase (New England Biolabs) following  
13 manufacturer's instructions. pGEX vectors containing *Crlf3* constructs were transformed into BL21-  
14 CodonPlus™-(DE3)-RP competent *E.coli* cells (Stratagene) following manufacturer's instructions.  
15 Glutathione-S-transferase (GST) fusion protein from *Crlf3* constructs were produced as previously  
16 reported<sup>55</sup>. GST was removed from CRLF3 constructs by affinity chromatography using GSTrap FF  
17 5mL columns and PreScission Protease (both GE Healthcare), following manufacturer's instructions.  
18 Remaining free GST was removed by ion exchange chromatography using HiTrap Q FF columns (GE  
19 Healthcare) following manufacturer's instructions. Protein was concentrated under centrifugation  
20 using VivaSpin 2 columns with 10kDa cut off (Sartorius Stedim Biotech) following manufacturer's  
21 instructions. Crystallisation was screened by the vapour diffusion method in 96-well sitting drop  
22 plates set up with a Nanodrop Screenmaker 96+8 (Innovadyne Technologies), using drops containing  
23 200nL protein and 200nL screening solution equilibrated with 70μL screening solution. Crystals from  
24 Screen plates Structure Screen 1 and 2, PACT Premier, Stura Footprint Screen, MacroSol and JCSG-  
25 Plus (all Molecular Dimensions), Wizard 1, 2, 3 and 4 and Cryo I and II (all Emerald BioSystems) and  
26 PEG/Ion Screen and PEG/Ion 2 Screen (both Hampton Research) were used. Screen plates were kept  
27 at 20°C and imaged using a Rock Imager crystal screening system (Formulatrix). Crystals from a range  
28 of conditions were picked for X-ray diffraction and cryoprotected for data collection at 100 K by  
29 adding 25% ethylene glycol (Hampton Research) or (in the case of the native data) coating the  
30 crystal in perfluoropolyether oil. A number of crystals underwent heavy atom soaking before  
31 cryoprotection. Diffraction data were recorded at Diamond Light Source (Didcot, UK), using  
32 beamline I04 for native and Hg-SAD data and beamline I02 for long-wavelength native. Diffraction  
33 data were indexed, integrated, and scaled using Mosflm<sup>7</sup> and Aimless<sup>8</sup> via the xia2 automated data  
34 processing pipeline<sup>9</sup>. Long-wavelength (1.7001 Å) native data were collected to a resolution of 1.74



1 Å from a crystal grown in 12 % PEG 3350, 0.1M sodium acetate, but attempts to solve the structure  
2 of CRLF3 construct 3 by S-SAD phasing failed, perhaps because of significant radiation damage. The  
3 structure was determined by Hg-single anomalous diffraction (SAD) using the AutoSol-wizard<sup>10</sup> of  
4 the PHENIX suite<sup>11</sup> with a dataset collected with a wavelength of 1.006 Å from a crystal grown in 20%  
5 PEG 3350, 0.2M sodium formate, pH 7.0, soaked with 10mM thimerosal (Sigma-Aldrich) for 16  
6 hours. Native data were collected with a wavelength of 0.9795 Å from a crystal grown in 25% PEG  
7 3350, 0.2 M ammonium acetate, 0.1 M Bis-Tris, pH 7.5. The structure was refined to a resolution of  
8 1.61 Å using Phenix.refine<sup>11</sup> and by manual building in Coot<sup>12</sup>. The final model has good statistics,  
9 with 96% of the chain in the Ramachandran favoured region and no Ramachandran outliers. Other  
10 crystallographic statistics are presented in Supplemental Table 3.  
11

1 **Supplemental Tables (Tables 2, 4, 5 and 7 are found in an additional excel file)**

2

3 **Supplemental Table 1: CRLF3 deficient mice (*Crlf3*<sup>-/-</sup>) have an isolated reduction in platelet count**

|                           | Male          |                             | Female        |                             |
|---------------------------|---------------|-----------------------------|---------------|-----------------------------|
|                           | WT            | <i>Crlf3</i> <sup>-/-</sup> | WT            | <i>Crlf3</i> <sup>-/-</sup> |
| <b>Young</b>              |               |                             |               |                             |
| Plt (10 <sup>3</sup> /μL) | 1424 (251)    | 875 (170)***                | 1117 (261)    | 686 (105)***                |
| MPV (fL)                  | 5.01 (0.38)   | 5.19 (0.37)                 | 4.96 (0.09)   | 5.08 (0.15)                 |
| Hgb (g/dL)                | 14.51 (1.16)  | 13.51 (1.42)                | 15.72 (2.33)  | 15.02 (1.58)                |
| RBC (10 <sup>6</sup> /μL) | 10.32 (1.38)  | 9.46 (1.48)                 | 10.21 (1.70)  | 9.68 (1.23)                 |
| WBC (10 <sup>3</sup> /μL) | 11.15 (2.64)  | 13.56 (5.71)                | 7.80 (1.44)   | 7.40 (3.46)                 |
| Age (weeks)               | 15.34 (2.93)  | 15.55 (3.38)                | 16.83 (2.90)  | 14.83 (2.39)                |
| <i>n</i>                  | 10            | 7                           | 5             | 5                           |
| <b>Middle aged</b>        |               |                             |               |                             |
| Plt (10 <sup>3</sup> /μL) | 1485 (205)    | 1079 (203)***               | 1035 (133)    | 771 (134)***                |
| MPV (fL)                  | 4.78 (0.23)   | 5.02 (0.22)                 | 4.96 (0.09)   | 5.13 (0.14)                 |
| Hgb (g/dL)                | 13.39 (1.88)  | 13.08 (1.23)                | 13.42 (0.97)  | 13.83 (1.03)                |
| RBC (10 <sup>6</sup> /μL) | 9.92 (1.56)   | 9.17 (0.80)                 | 8.71 (0.75)   | 9.04 (0.60)                 |
| WBC (10 <sup>3</sup> /μL) | 9.71 (2.70)   | 8.38 (1.06)                 | 6.86 (1.34)   | 5.70 (1.38)                 |
| Age (weeks)               | 31.17 (5.27)  | 27.31 (4.15)                | 27.14 (4.30)  | 25.86 (4.69)                |
| <i>n</i>                  | 10            | 5                           | 5             | 6                           |
| <b>Old</b>                |               |                             |               |                             |
| Plt (10 <sup>3</sup> /μL) | 1514 (444)    | 1132 (384)***               | 1324 (242)    | 772 (162)***                |
| MPV (fL)                  | 5.30 (0.42)   | 5.21 (0.60)                 | 5.50 (0.64)   | 5.42 (0.39)                 |
| Hgb (g/dL)                | 13.86 (0.75)  | 12.43 (1.44)                | 13.47 (1.73)  | 13.24 (1.33)                |
| RBC (10 <sup>6</sup> /μL) | 10.34 (1.03)  | 9.02 (1.55)                 | 9.57 (1.65)   | 8.95 (1.36)                 |
| WBC (10 <sup>3</sup> /μL) | 10.53 (3.18)  | 12.30 (3.36)                | 6.18 (0.95)   | 7.96 (3.47)                 |
| Age (weeks)               | 65.39 (13.21) | 64.94 (14.43)               | 69.01 (14.56) | 65.55 (15.40)               |
| <i>n</i>                  | 12            | 23                          | 11            | 14                          |

4

5 Full blood counts determined by an automated haemocytometer on EDTA anticoagulated venous  
6 blood taken from male and female young (12-20 weeks), middle aged (21-40 weeks) and old (>48  
7 weeks) mice. Data represents mean (SD). Unpaired 2-tailed Student's *t* test with correction for  
8 multiple comparisons using the Holm-Sidak method. \*\*\* denotes *p*<0.005. Plt - platelet count; MPV -  
9 mean platelet volume; Hgb - haemoglobin concentration; RBC - red blood cell count; WBC - white  
10 blood cell count.

11

1 **Supplemental Table 3: Data collection and refinement statistics**

|                                                     | Hg-SAD                    | Native 1                 | S-SAD                    |
|-----------------------------------------------------|---------------------------|--------------------------|--------------------------|
| <b>Data collection</b>                              |                           |                          |                          |
| Wavelength (Å)                                      | 1.006                     | 0.9795                   | 1.7001                   |
| Space group                                         | C2                        | C2                       | C2                       |
| Cell dimensions                                     |                           |                          |                          |
| <i>a, b, c</i> (Å)                                  | 87.25, 40.94,<br>76.29    | 88.03, 40.38,<br>76.53   | 87.80, 40.60,<br>76.66   |
| $\alpha, \beta, \gamma$ (°)                         | 90, 98.74, 90             | 90, 99.94, 90            | 90, 99.80, 90            |
| Resolution (Å)                                      | 27.3-1.97<br>(2.02-1.97)* | 37.7-1.61<br>(1.65-1.61) | 32.1-1.74<br>(1.79-1.74) |
| <i>R</i> <sub>meas</sub>                            | 0.095 (0.861)             | 0.066 (1.100)            | 0.067 (0.930)            |
| <i>I</i> / $\sigma I$                               | 16.6 (2.1)                | 13.3 (1.4)               | 20.0 (2.1)               |
| Completeness (%)                                    | 99.7 (96.0)               | 96.7 (94.9)              | 88.4 (49.2)              |
| Redundancy                                          | 6.7 (6.7)                 | 3.4 (3.6)                | 9.3 (6.4)                |
| CC <sub>1/2</sub>                                   | 0.999 (0.829)             | 0.999 (0.504)            | 0.999 (0.492)            |
| CC <sub>anom</sub>                                  | 0.689 (0.039)             | —                        | 0.323 (0.040)            |
| <b>Refinement</b>                                   |                           |                          |                          |
| Resolution (Å)                                      | 27.3-1.97                 | 37.7-1.61                | 32.1-1.74                |
| No. refl. work / free                               | 19150 / 907               | 31712 / 1613             | 23106 / 1204             |
| <i>R</i> <sub>work</sub> / <i>R</i> <sub>free</sub> | 0.186 / 0.234             | 0.177 / 0.201            | 0.177 / 0.200            |
| No. atoms                                           |                           |                          |                          |
| Protein                                             | 1951                      | 2000                     | 2011                     |
| Ligand/ion                                          | 11                        | 0                        | 0                        |
| Water                                               | 93                        | 108                      | 166                      |
| B-factors                                           |                           |                          |                          |
| Protein (Å <sup>2</sup> )                           | 39.5                      | 36.8                     | 38.8                     |
| Water (Å <sup>2</sup> )                             | 41.8                      | 32.1                     | 42.3                     |
| R.m.s. deviations                                   |                           |                          |                          |
| Bond lengths (Å)                                    | 0.012                     | 0.009                    | 0.011                    |
| Bond angles (°)                                     | 1.134                     | 1.066                    | 1.001                    |
| PDB ID                                              | 6RPY                      | 6RPX                     | 6RPZ                     |

\*Values in parentheses are for highest-resolution shell.

2  
3

1 **Supplementary Table 6: Full blood counts of *Crlf3*<sup>-/-</sup> x JAK2V617F ET animals**

|                                           | Plt<br>(10 <sup>3</sup> /μL) | MPV (fL)       | Hgb<br>(g/dL)   | RBC<br>(10 <sup>6</sup> /μL) | WBC<br>(10 <sup>3</sup> /μL) | Age<br>(weeks)   | <i>n</i> |
|-------------------------------------------|------------------------------|----------------|-----------------|------------------------------|------------------------------|------------------|----------|
| <b>Young</b>                              |                              |                |                 |                              |                              |                  |          |
| 1 - WT control                            | 875 (306)                    | 5.62<br>(0.26) | 14.52<br>(0.75) | 10.52<br>(0.54)              | 10.37<br>(4.24)              | 10.22<br>(3.46)  | 6        |
| 2 - <i>Crlf3</i> <sup>-/-</sup>           | 686 (222)                    | 5.71<br>(0.32) | 13.63<br>(1.48) | 9.98<br>(1.22)               | 8.90<br>(2.93)               | 9.49<br>(3.38)   | 7        |
| 3 - JAK2V617F ET                          | 1489<br>(255)                | 5.64<br>(0.36) | 14.79<br>(0.94) | 10.68<br>(0.63)              | 10.16<br>(2.27)              | 12.53<br>(4.79)  | 7        |
| 4 - <i>Crlf3</i> <sup>-/-</sup> JAK2V617F | 879 (229)                    | 5.83<br>(0.53) | 14.78<br>(1.54) | 10.93<br>(1.27)              | 11.42<br>(2.35)              | 12.31<br>(4.24)  | 6        |
| Statistical testing                       |                              |                |                 |                              |                              |                  |          |
| 1 v 2                                     | ***                          | ns             | ns              | ns                           | ns                           | ns               |          |
| 1 v 3                                     | ***                          | ns             | ns              | ns                           | ns                           | ns               |          |
| 1 v 4                                     | ns                           | ns             | ns              | ns                           | ns                           | ns               |          |
| 2 v 3                                     | ***                          | ns             | ns              | ns                           | ns                           | ns               |          |
| 2 v 4                                     | ***                          | ns             | ns              | ns                           | ns                           | ns               |          |
| 3 v 4                                     | ***                          | ns             | ns              | ns                           | ns                           | ns               |          |
| <b>Old</b>                                |                              |                |                 |                              |                              |                  |          |
| 1 - WT control                            | 1030<br>(426)                | 5.46<br>(0.52) | 13.90<br>(1.19) | 10.24<br>(0.41)              | 12.42<br>(4.13)              | 57.86<br>(7.77)  | 5        |
| 2 - <i>Crlf3</i> <sup>-/-</sup>           | 712 (227)                    | 5.31<br>(0.59) | 13.54<br>(1.77) | 9.55<br>(1.42)               | 8.00<br>(2.06)               | 65.74<br>(8.17)  | 7        |
| 3 - JAK2V617F ET                          | 1446<br>(276)                | 5.30<br>(0.47) | 13.58<br>(1.33) | 10.23<br>(1.05)              | 9.27<br>(3.01)               | 68.06<br>(11.05) | 9        |
| 4 - <i>Crlf3</i> <sup>-/-</sup> JAK2V617F | 890 (137)                    | 5.12<br>(0.34) | 14.97<br>(2.23) | 11.13<br>(1.66)              | 8.72<br>(0.68)               | 71.95<br>(16.10) | 6        |
| Statistical testing                       |                              |                |                 |                              |                              |                  |          |
| 1 v 2                                     | ***                          | ns             | ns              | ns                           | ns                           | ns               |          |
| 1 v 3                                     | ***                          | ns             | ns              | ns                           | ns                           | ns               |          |
| 1 v 4                                     | ns                           | ns             | ns              | ns                           | ns                           | ns               |          |
| 2 v 3                                     | ***                          | ns             | ns              | ns                           | ns                           | ns               |          |
| 2 v 4                                     | *                            | ns             | ns              | ns                           | ns                           | ns               |          |
| 3 v 4                                     | ***                          | ns             | ns              | ns                           | ns                           | ns               |          |

2  
3 Full blood counts determined using an automated haemocytometer on EDTA anticoagulated venous  
4 blood withdrawn from young (≤20-week-old) and old (≥48-week-old) female WT control, *Crlf3*<sup>-/-</sup>,  
5 JAK2V617F ET and *Crlf3*<sup>-/-</sup> JAK2V617F mice. Data represents mean (SD). Two-way ANOVA with  
6 correction for multiple comparisons using the Holm-Sidak method. \*, \*\*\* and ns denote *p*<0.05,  
7 *p*<0.005 and non-significant, respectively. Plt - platelet count; MPV - mean platelet volume; HgB -  
8 haemoglobin concentration; RBC - red blood cell count; WBC - white blood cell count.

9  
10  
11  
12

1 **Supplemental Figures**

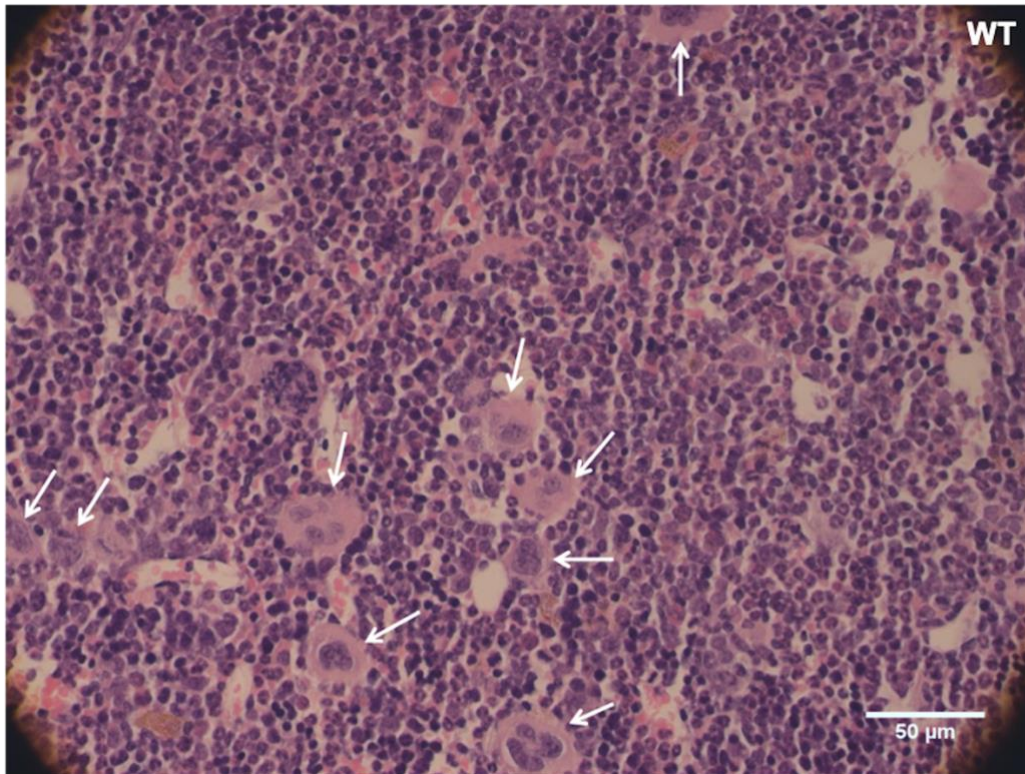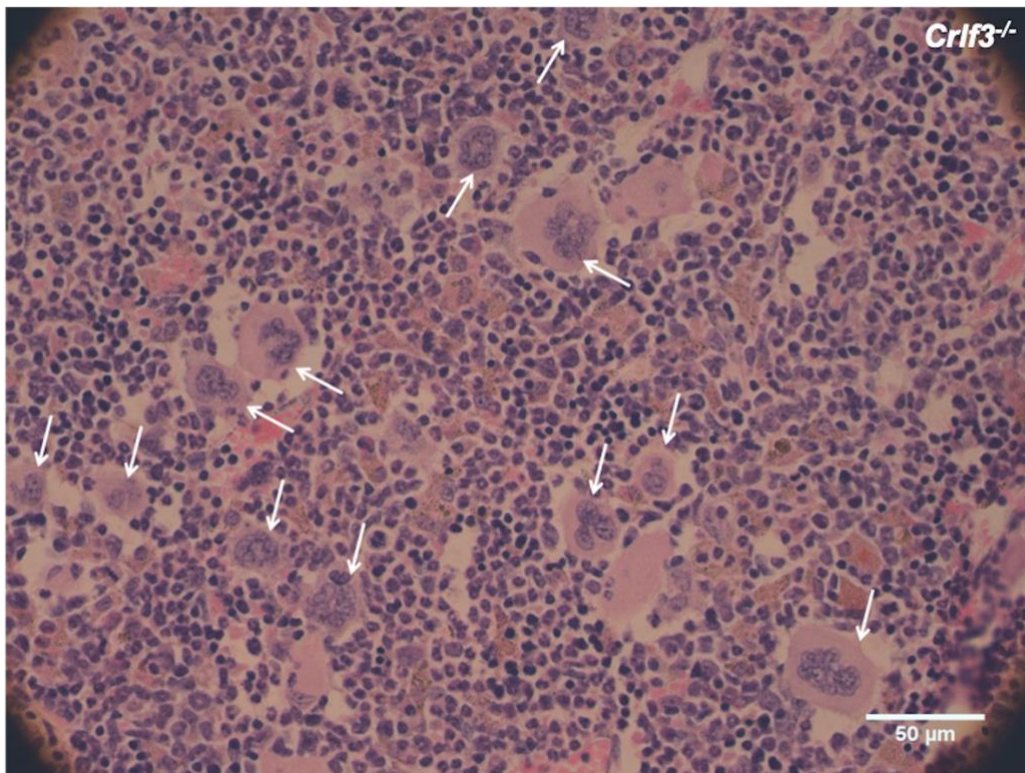

2  
3 **Supplemental Figure 1: Quantification of bone marrow residing MKs**

4 Control (WT) and *Cr1f3*<sup>-/-</sup> tibia were fixed, sectioned, and stained with Haematoxylin and eosin (H&E).  
5 MKs were quantified after imaging by light microscopy. Images are representative of each genotype  
6 and arrows point to MKs. Scale bars are 50 $\mu$ m.



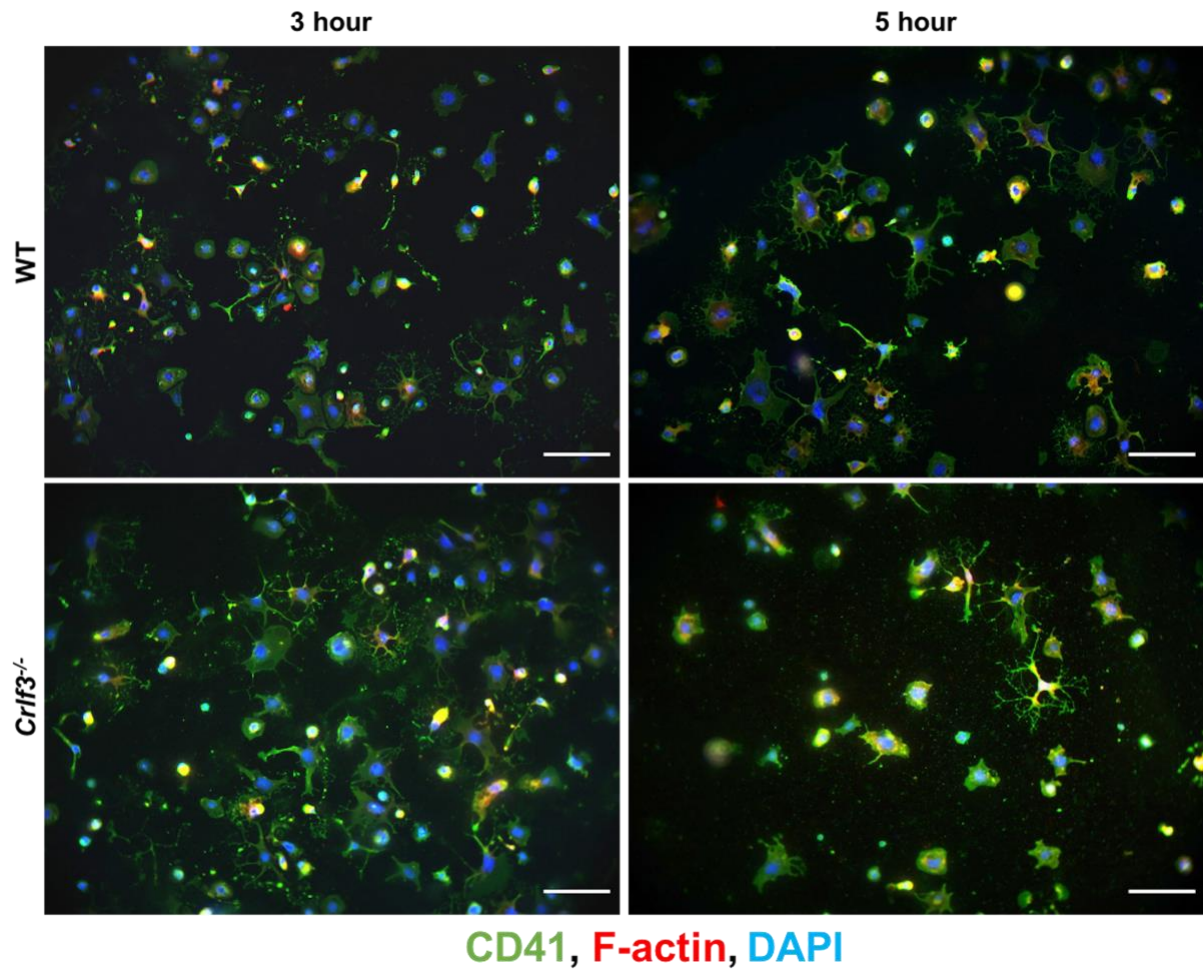

1

2 **Supplemental Figure 2: CRLF3 deficiency increases speed of proplatelet formation**

3 *In vitro* cultured MKs were seeded onto fibrinogen coated coverslips and incubated at 37°C for 3 or 5  
 4 hours to induce proplatelet formation. Samples were fixed, stained with CD41 (green), F-actin (red)  
 5 and DAPI (blue), and imaged by confocal microscopy. Images are representative of each genotype at  
 6 each time point. Scale bars are 50µm.

7

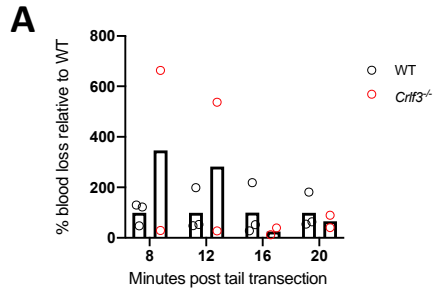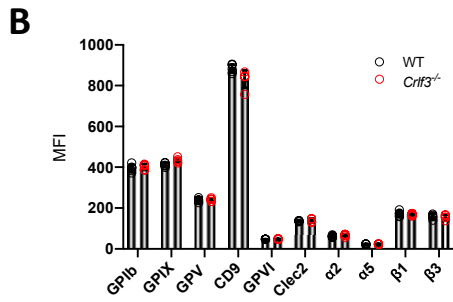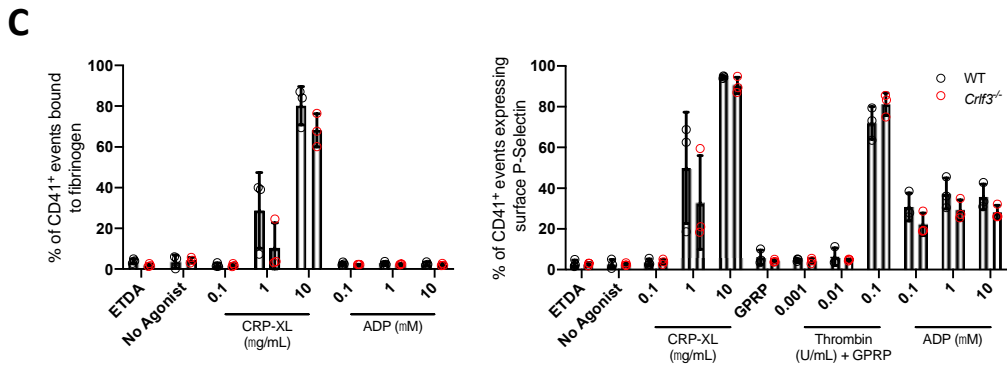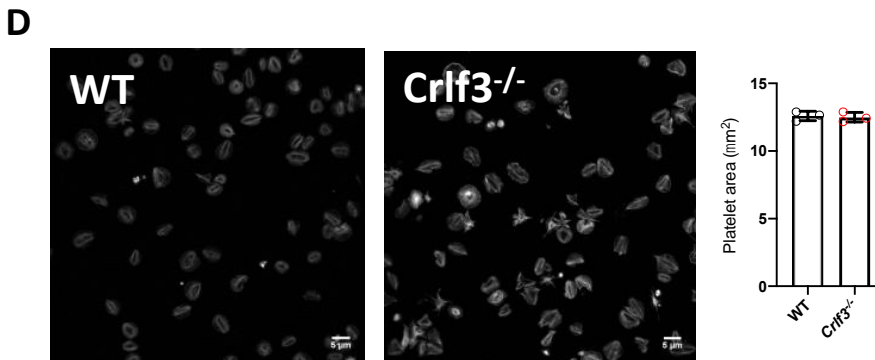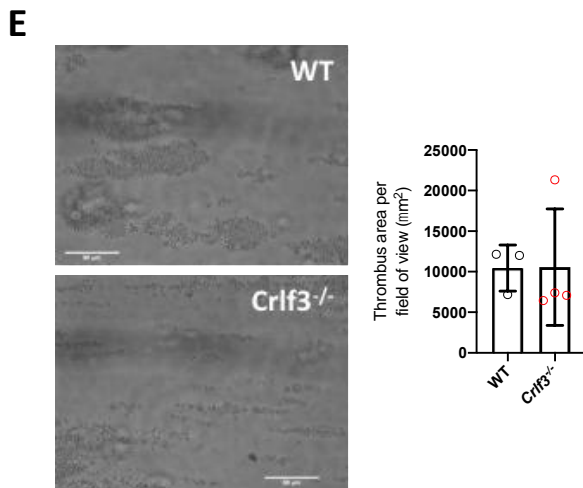

1 **Supplemental Figure 3: CRLF3 deficiency does not affect platelet function**

2 (A) Control (WT, black) and *Crif3*<sup>-/-</sup> (red) blood loss after removal of tail tip. (B) Control (WT, black)  
3 and *Crif3*<sup>-/-</sup> (red) whole blood incubated with antibodies against the membrane proteins GPIb, GPIX,  
4 GPV, CD9, GPVI, Clec2,  $\alpha$ 2,  $\alpha$ 5,  $\beta$ 1 and  $\beta$ 3 and assessed by flow cytometry, gating on platelet sized  
5 events ( $n=5$ ). (C) Control (WT, black) and *Crif3*<sup>-/-</sup> (red) whole blood incubated with specific antibodies  
6 against CD41, P-Selectin and fibrinogen with or without addition of agonists. Percentage of CD41<sup>+</sup>  
7 events bound to fibrinogen (left panel) or expressing surface P-selectin (right panel) was determined  
8 by flow cytometry ( $n=3$ ). (D) Control (WT, black) and *Crif3*<sup>-/-</sup> (red) washed platelets seeded onto  
9 fibrinogen coated coverslips and incubated for 30 mins at 37°C, fixed, stained for F-actin and imaged  
10 by fluorescence microscopy. Platelet area determined by thresholding images on F-actin staining  
11 using ImageJ ( $n=3$ ). (E) Heparinised whole blood flowed at arterial shear rate ( $1,000\text{ s}^{-1}$ ) over a  
12 surface coated with fibrillar collagen and imaged by light microscopy. Thrombus area for control  
13 (WT, black) and *Crif3*<sup>-/-</sup> (red) mice determined by manually measuring the size of each thrombi using  
14 ImageJ ( $n=3\text{ WT}/4\text{ Crif3}^{-/-}$ ). Data represents mean  $\pm$  SD. Unpaired 2-tailed Student's *t* test (D and E)  
15 with correction for multiple comparisons using the Holm-Sidak method (B and C). MFI = mean  
16 fluorescent intensity.

17

18



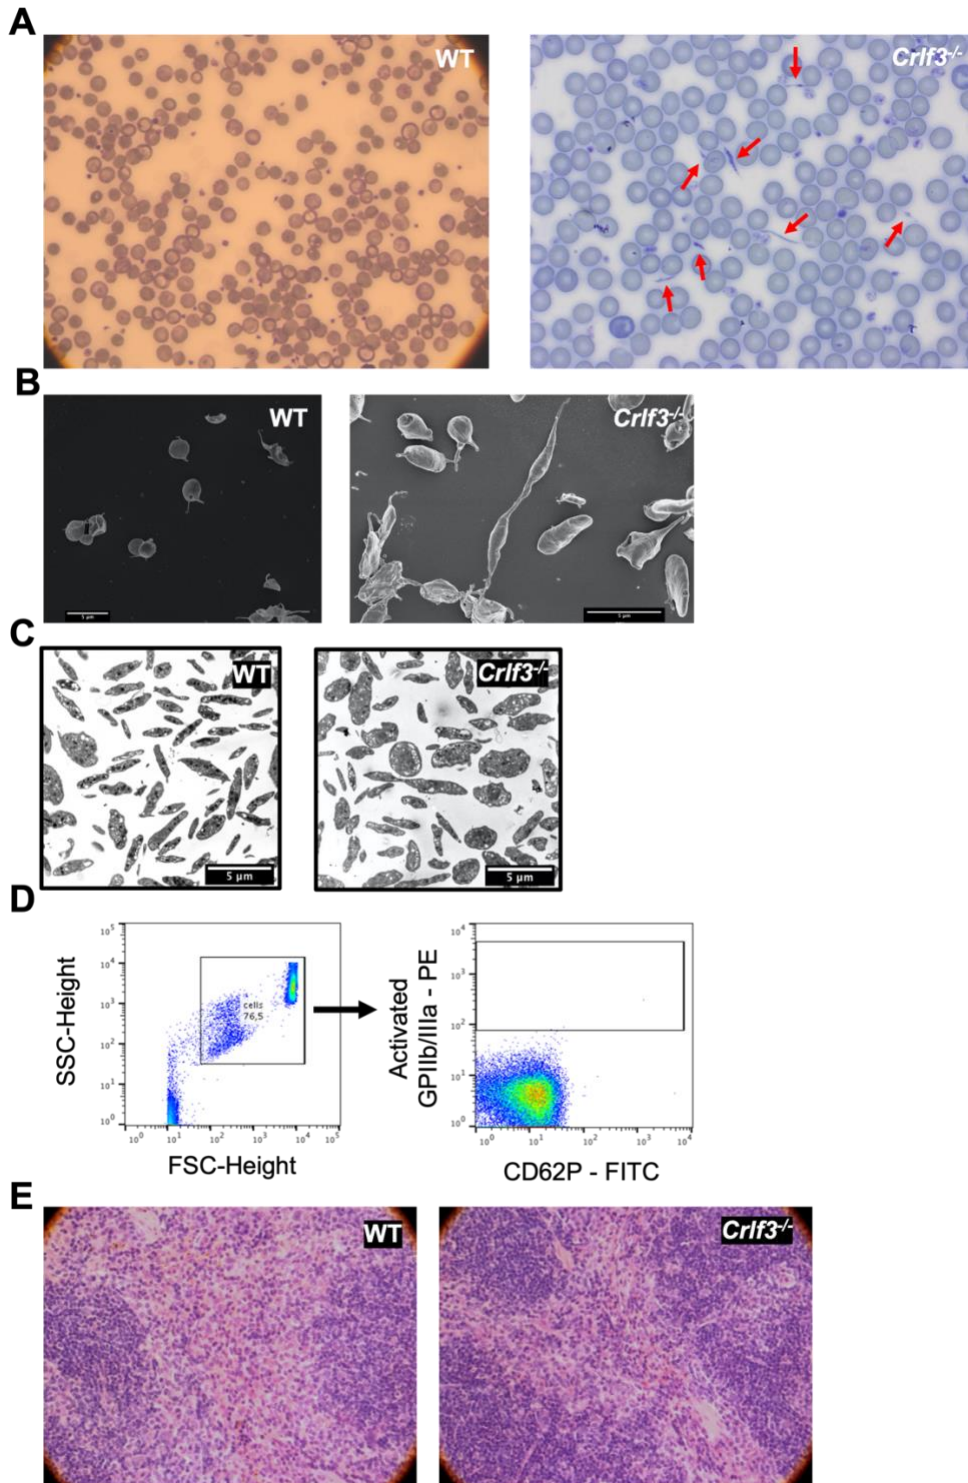

1  
2  
3  
4  
5  
6  
7  
8  
9  
10

**Supplemental Figure 4: CRLF3 deficiency causes ineffective thrombopoiesis**

(A) Blood smears from control (WT) and *Crif3*<sup>-/-</sup> whole blood taken at 63x and 100x magnification under light microscopy, respectively. Red arrows point to elongated spindle form preplatelet structures. (B) Control (WT) and *Crif3*<sup>-/-</sup> washed platelets were fixed and prepared for scanning and (C) transmission electron microscopy. Scale bars are 5µm. (D) To rule out the possibility that preplatelets are platelet microaggregates, heparinised venous blood was incubated with specific antibodies against activated GPIIb/IIIa and CD62P and assessed by flow cytometry. (E) Hematoxylin and eosin-stained spleen sections from control (WT) and *Crif3*<sup>-/-</sup> mice imaged at 20x magnification under light microscopy.

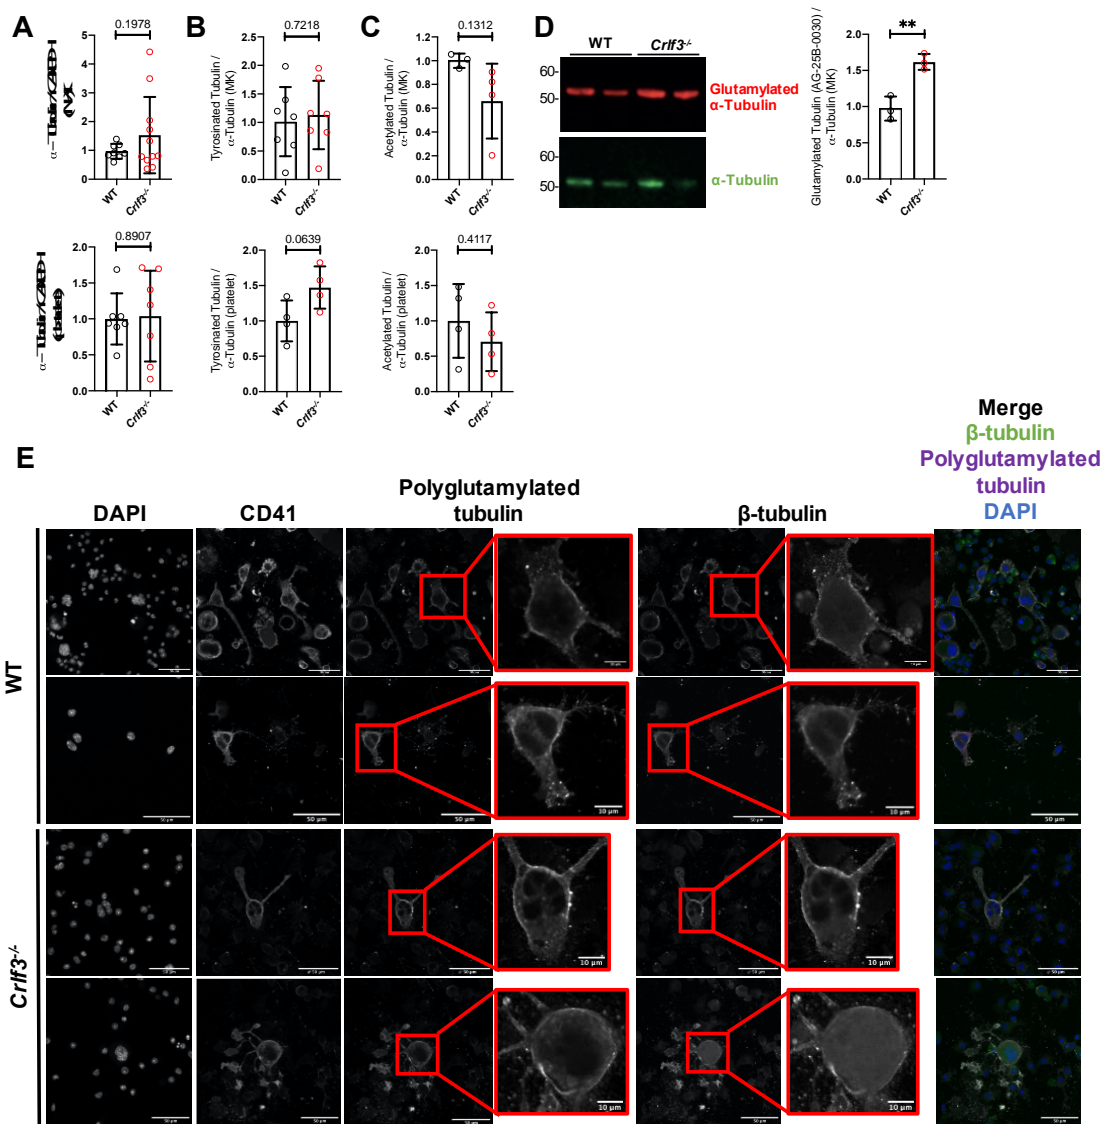

1

2 **Supplemental Figure 5: Tubulin modifications in MKs and platelets**

3 (A) Densitometry quantification of  $\alpha$ -Tubulin relative to GAPDH ( $n=7$  platelet;  $n=8$  WT/11 *Crif3*<sup>-/-</sup>  
 4 MK), (B) tyrosine  $\alpha$ -Tubulin relative to  $\alpha$ -Tubulin ( $n=4$  platelet;  $n=7$  MK), (C) acetylated  $\alpha$ -Tubulin  
 5 relative to  $\alpha$ -Tubulin ( $n=4$  platelet;  $n=3$  WT/4 *Crif3*<sup>-/-</sup> MK) and (D) polyglutamylated tubulin (AG-25B-  
 6 0030, AdipoGen) relative to  $\alpha$ -Tubulin ( $n=3$  MK) from western blots of *in vitro* cultured MK (top  
 7 panels) and platelet (bottom panels) lysates from control (WT, back) and *Crif3*<sup>-/-</sup> (red) animals probed  
 8 with specific antibodies. (E) *In vitro* cultured MKs were seeded onto fibrinogen coated coverslips and  
 9 incubated at 37°C for 5 hours to induce proplatelet formation. Samples were fixed, stained for CD41,  
 10 polyglutamylated  $\alpha$ -Tubulin (AG-25B-0030; magenta),  $\beta$ -tubulin (green) and DAPI (blue) imaged by  
 11 fluorescence microscopy. Images are representative for *Crif3*<sup>-/-</sup> and control (WT) proplatelet forming  
 12 MKs. Scale bars are 50 $\mu$ m and 10 $\mu$ m in the boxed zoomed images. Data represents mean or mean $\pm$   
 13 SD. Unpaired 2-tailed Student's or Welch's (A - MK only) t test.

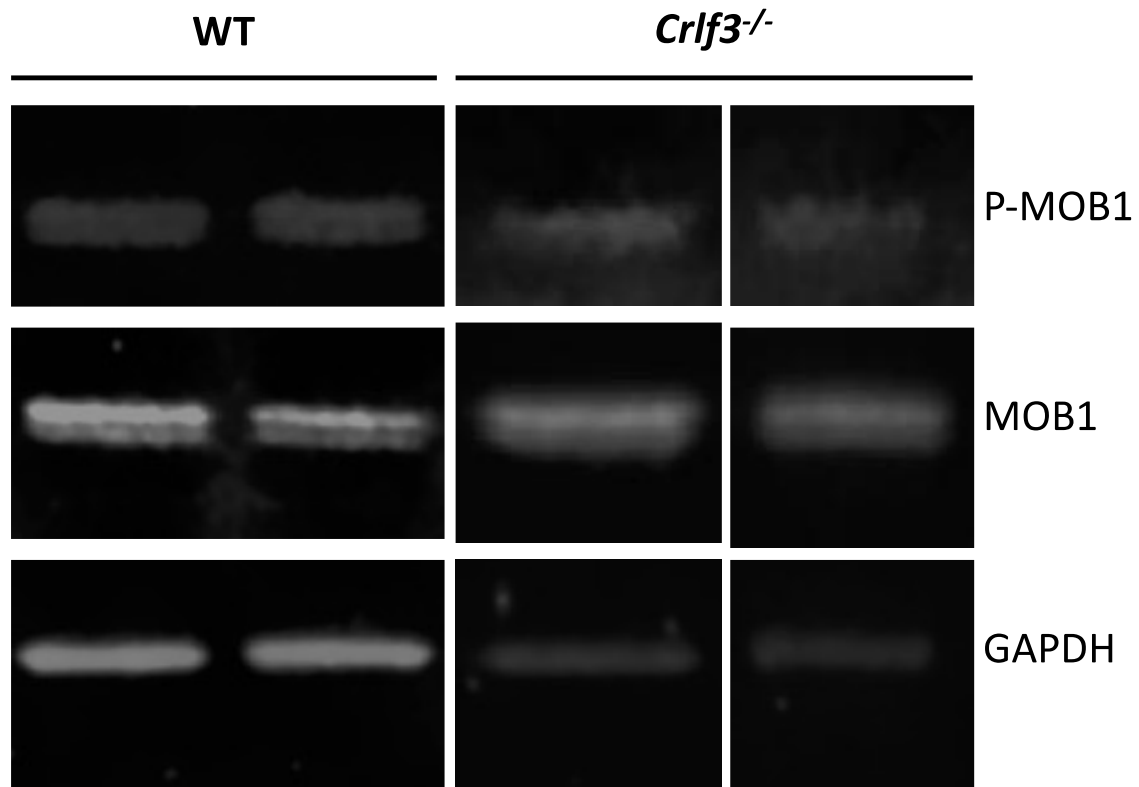

1  
2

3 **Supplemental Figure 6: Mob1 phosphorylation in control and *Crlf3*<sup>-/-</sup> MK**

4 Western blot of WT (control) and *Crlf3*<sup>-/-</sup> *in vitro* cultured MKs probed with specific antibodies  
5 against phosphorylated MOB1 (P-MOB1), MOB1 and GAPDH.

1

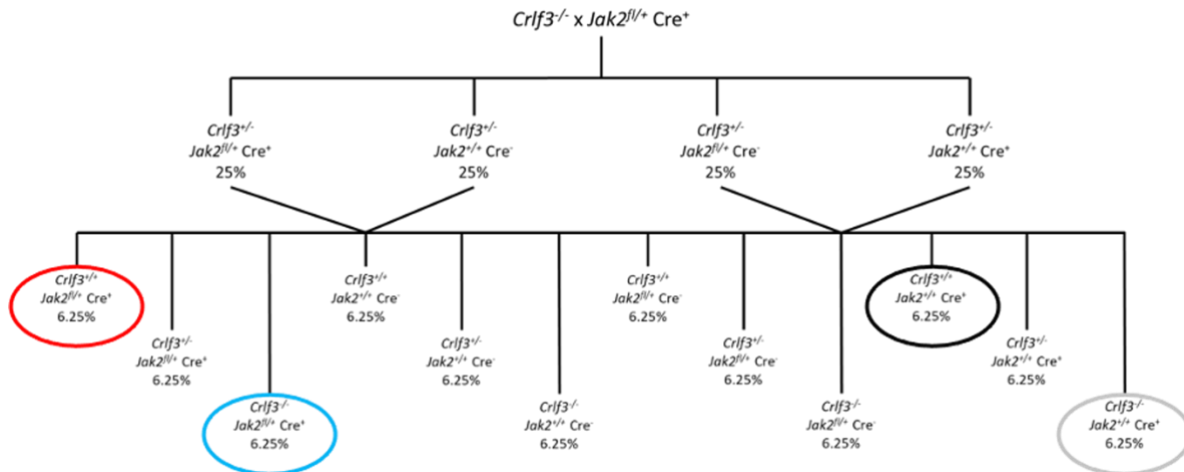

2

3

**Supplemental Figure 7: Breeding strategy to study effect of *Crlf3* ablation on essential**

4

**thrombocythaemia**

5

*Crlf3*<sup>-/-</sup> mice were crossbred with JAK2V617F Essential Thrombocythaemia (ET) mice<sup>13</sup> generating

6

*Crlf3* heterozygous intermediates, which were cross bred again to generate lines of interest.

7

Genotypes of interest are circled (black = WT control; grey = *Crlf3*<sup>-/-</sup>; red = JAK2V617F ET and green =

8

*Crlf3*<sup>-/-</sup> JAK2V617F).

9

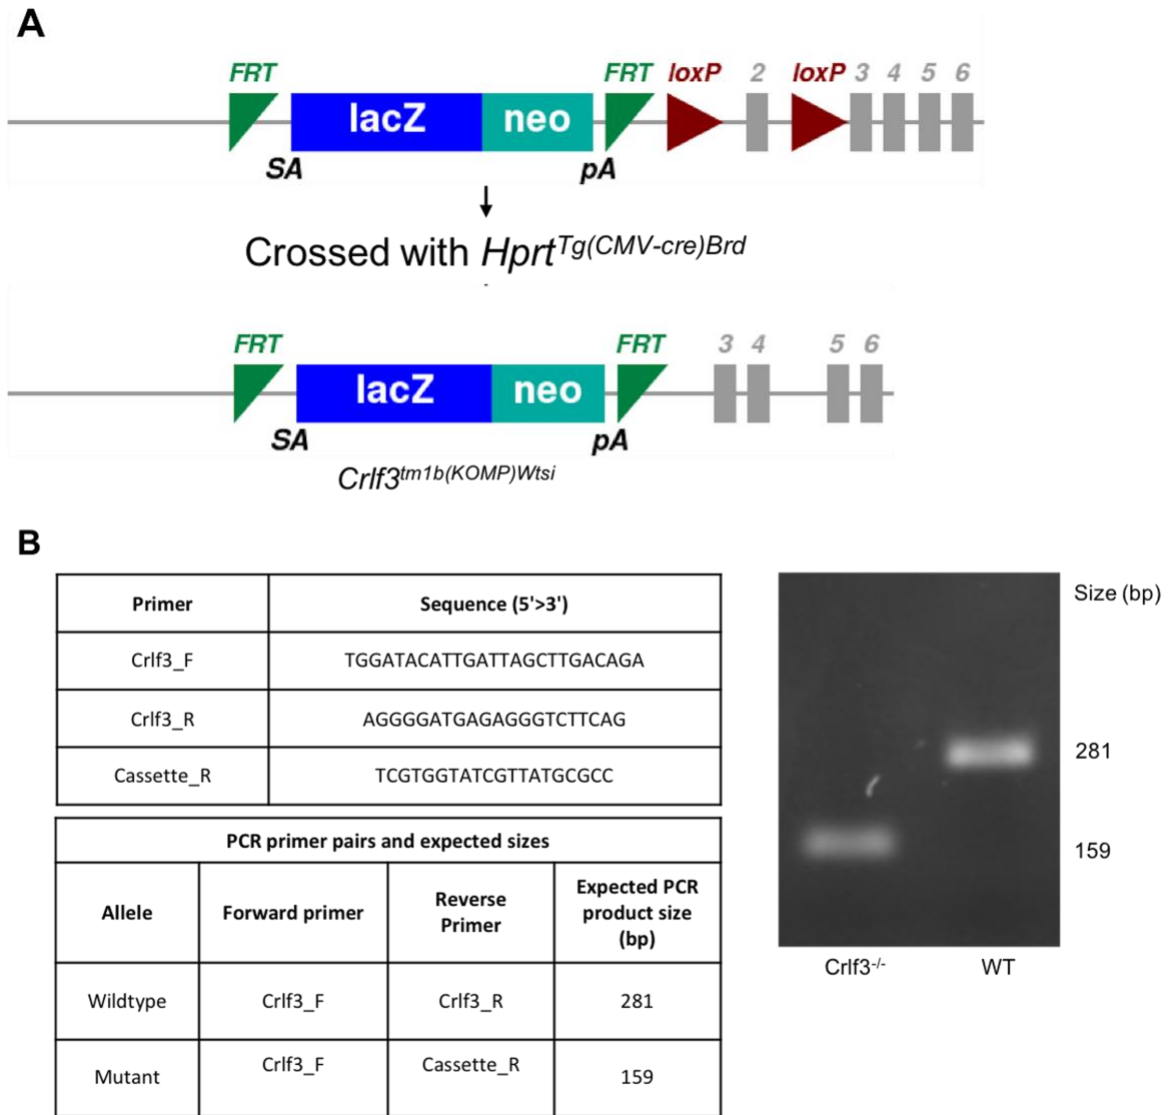

1

2 **Supplemental Figure 7: Generation of *Crif3<sup>tm1b(KOMP)Wtsi</sup> (*Crif3<sup>-/-</sup>)* mice*** (A) The allele structure for  
 3 *Crif3*. Exon 2 was excised by cre-mediated recombination. (B) Primers used for mouse genotyping,  
 4 expected band size and representative image of a genotyping assay.

5

6

7

1 **Videos**

2

3 **Video 1 and 2: Proplatelet formation is not impaired in *Crlf3*<sup>-/-</sup> mice**

4 Anesthetised Control (WT; **Video 1**) and *Crlf3*<sup>-/-</sup> (**Video 2**) mice injected with tetramethylrhodamine

5 dextran and anti-CD105 (both red) to label bone vasculature and anti-GPIX (green) to label platelets

6 and MKs. Fronto-parietal skull exposed, and images acquired every 5 seconds by fluorescence

7 microscopy and videos created using ImageJ. Scale bars are 50µm.

8

## References

1. Hobbs CM, Manning H, Bennett C, et al. JAK2V617F leads to intrinsic changes in platelet formation and reactivity in a knock-in mouse model of essential thrombocythemia. *Blood*. 2013;122(23):3787-3797.
2. Mayer L, Jaszal M, Pardo M, et al. Nbeal2 interacts with Dock7, Sec16a, and Vac14. *Blood*. 2018;131(9):1000-1011.
3. Evans AL, Dalby A, Foster HR, et al. Transfer to the clinic: refining forward programming of hPSCs to megakaryocytes for platelet production in bioreactors. *Blood Adv*. 2021;5(7):1977-1990.
4. Hodgkins A, Farne A, Perera S, et al. WGE: a CRISPR database for genome engineering. *Bioinformatics*. 2015;31(18):3078-3080.
5. Ran FA, Hsu PD, Wright J, Agarwala V, Scott DA, Zhang F. Genome engineering using the CRISPR-Cas9 system. *Nat Protoc*. 2013;8(11):2281-2308.
6. Pardo M, Lang B, Yu L, et al. An expanded Oct4 interaction network: implications for stem cell biology, development, and disease. *Cell Stem Cell*. 2010;6(4):382-395.
7. Leslie AGW, Powell HR. Processing diffraction data with mosflm. In: Read RJ, Sussman JL, eds. *Evolving Methods for Macromolecular Crystallography: The Structural Path to the Understanding of the Mechanism of Action of CBRN Agents*. Dordrecht: Springer Netherlands; 2007:41-51.
8. Evans PR. An introduction to data reduction: space-group determination, scaling and intensity statistics. *Acta Crystallogr D Biol Crystallogr*. 2011;67(Pt 4):282-292.
9. Winter G. xia2: an expert system for macromolecular crystallography data reduction. *Journal of Applied Crystallography*. 2010;43(1):186-190.
10. Terwilliger TC, Adams PD, Read RJ, et al. Decision-making in structure solution using Bayesian estimates of map quality: the PHENIX AutoSol wizard. *Acta Crystallogr D Biol Crystallogr*. 2009;65(Pt 6):582-601.
11. Adams PD, Afonine PV, Bunkoczi G, et al. PHENIX: a comprehensive Python-based system for macromolecular structure solution. *Acta Crystallogr D Biol Crystallogr*. 2010;66(Pt 2):213-221.
12. Emsley P, Lohkamp B, Scott WG, Cowtan K. Features and development of Coot. *Acta Crystallogr D Biol Crystallogr*. 2010;66(Pt 4):486-501.
13. Li J, Spensberger D, Ahn JS, et al. JAK2 V617F impairs hematopoietic stem cell function in a conditional knock-in mouse model of JAK2 V617F-positive essential thrombocythemia. *Blood*. 2010;116(9):1528-1538.
